# Supplementary material for: mTOR pathway gene mutations predict response to immune checkpoint inhibitors in multiple cancers
Source: Springer Nature journal article supplement (doi:10.1186/s12967-022-03436-1), 2022-05-31
Supplement: MOESM1 [file 23112650]

# Figure S1

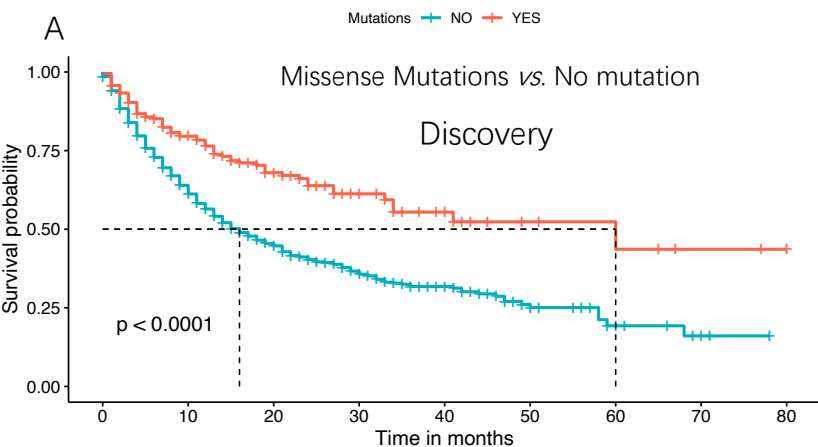

Number at risk

|     |      |     |     |     |    |    |   |   |   |
|-----|------|-----|-----|-----|----|----|---|---|---|
| NO  | 1420 | 742 | 340 | 152 | 63 | 26 | 9 | 3 | 0 |
| YES | 210  | 132 | 82  | 39  | 19 | 7  | 6 | 3 | 2 |

| Comparison | HR (95% CI)      | P                     |
|------------|------------------|-----------------------|
| Yes vs. No | 0.59 (0.45-0.77) | $9.33 \times 10^{-5}$ |

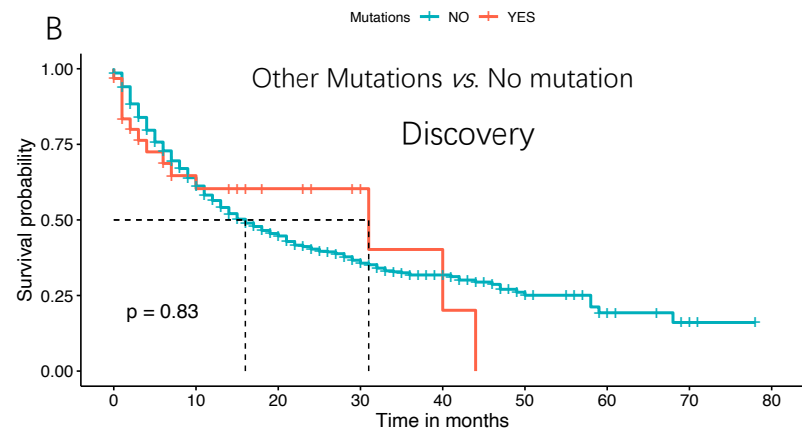

Number at risk

|     |      |     |     |     |    |    |   |   |   |
|-----|------|-----|-----|-----|----|----|---|---|---|
| NO  | 1420 | 742 | 340 | 152 | 63 | 26 | 9 | 3 | 0 |
| YES | 31   | 15  | 7   | 4   | 2  | 0  | 0 | 0 | 0 |

| Comparison | HR (95% CI)      | P     |
|------------|------------------|-------|
| Yes vs. No | 1.11 (0.65-1.91) | 0.695 |

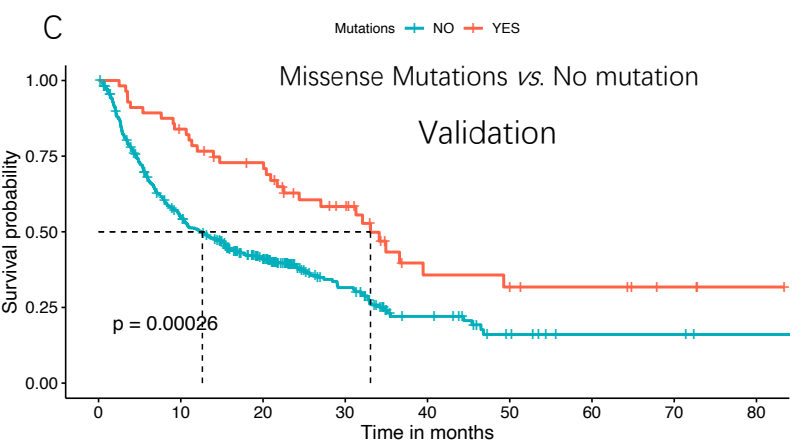

Number at risk

|     |     |     |     |    |    |   |   |   |   |
|-----|-----|-----|-----|----|----|---|---|---|---|
| NO  | 423 | 218 | 125 | 47 | 20 | 8 | 3 | 3 | 1 |
| YES | 56  | 46  | 37  | 24 | 9  | 8 | 6 | 3 | 1 |

| Comparison | LER (95% CI)     | P                     |
|------------|------------------|-----------------------|
| Yes vs. No | 2.23 (1.43-3.49) | $4.71 \times 10^{-4}$ |

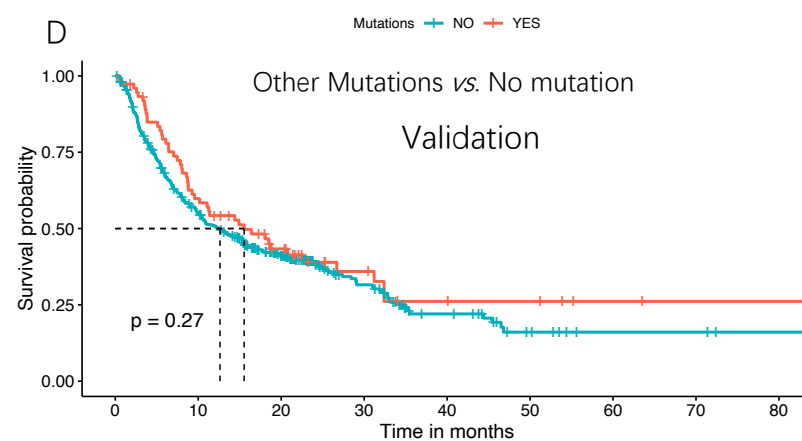

Number at risk

|     |     |     |     |    |    |   |   |   |   |
|-----|-----|-----|-----|----|----|---|---|---|---|
| NO  | 423 | 218 | 125 | 47 | 20 | 8 | 3 | 3 | 1 |
| YES | 74  | 43  | 25  | 12 | 7  | 6 | 3 | 2 | 2 |

| Comparison | LER (95% CI)     | P     |
|------------|------------------|-------|
| Yes vs. No | 1.61 (0.96-2.72) | 0.072 |

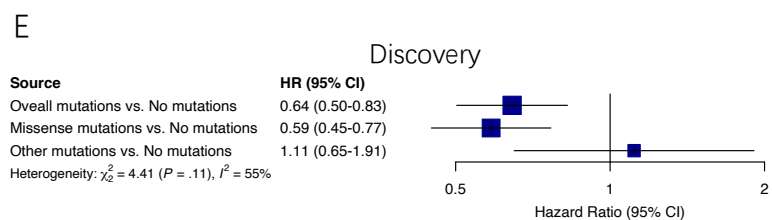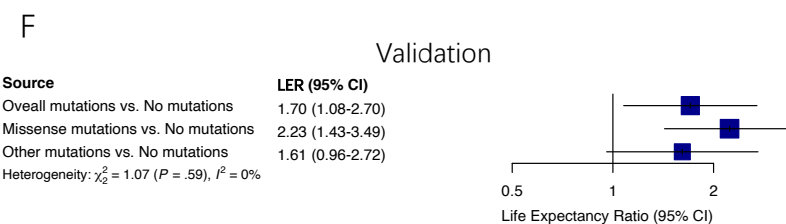

# Figure S2

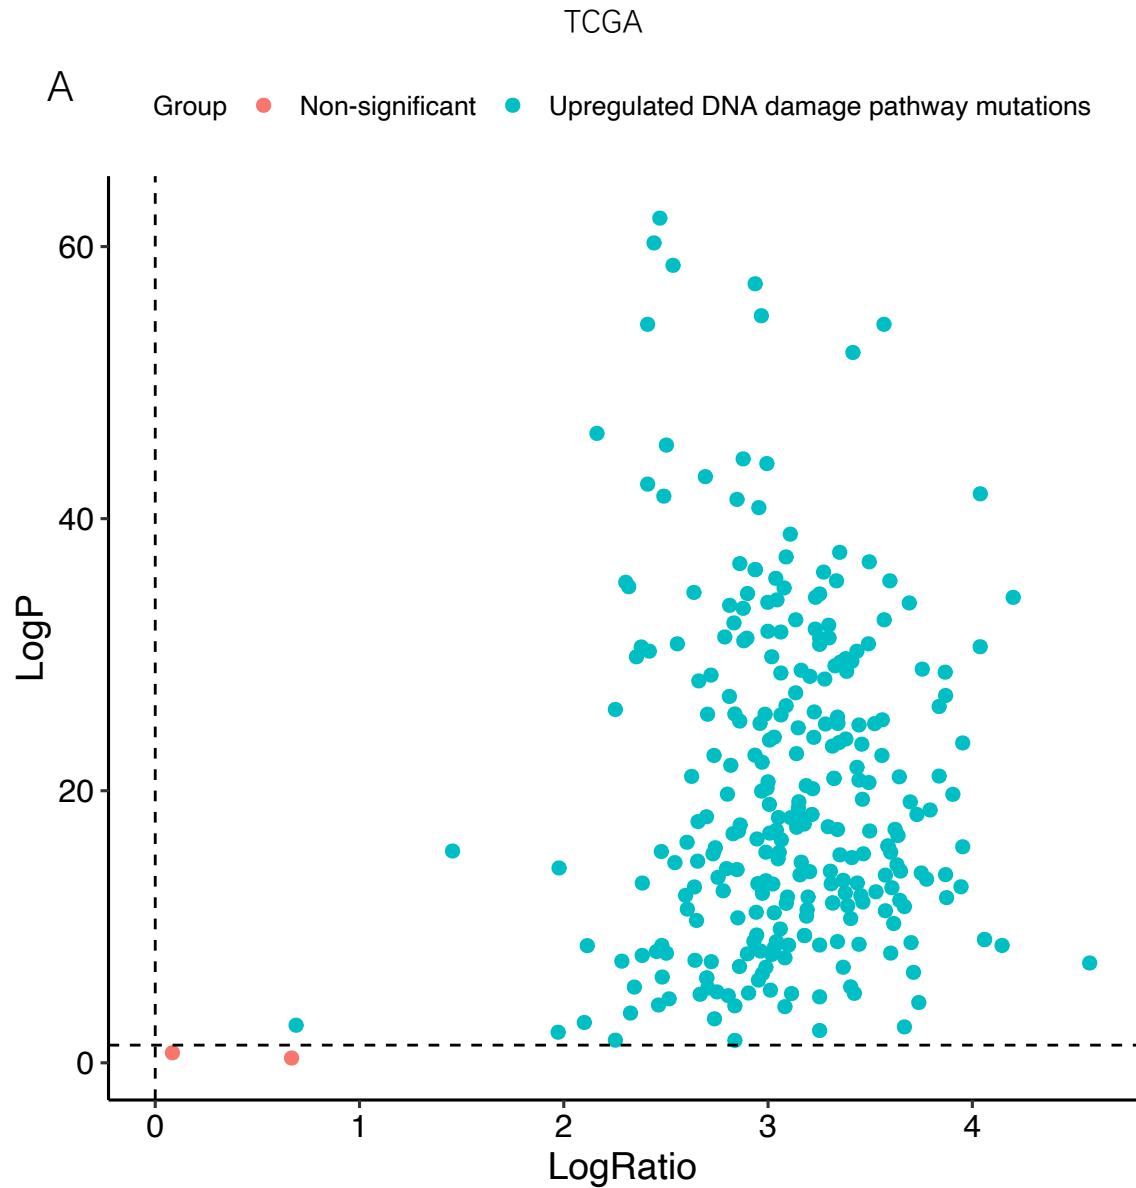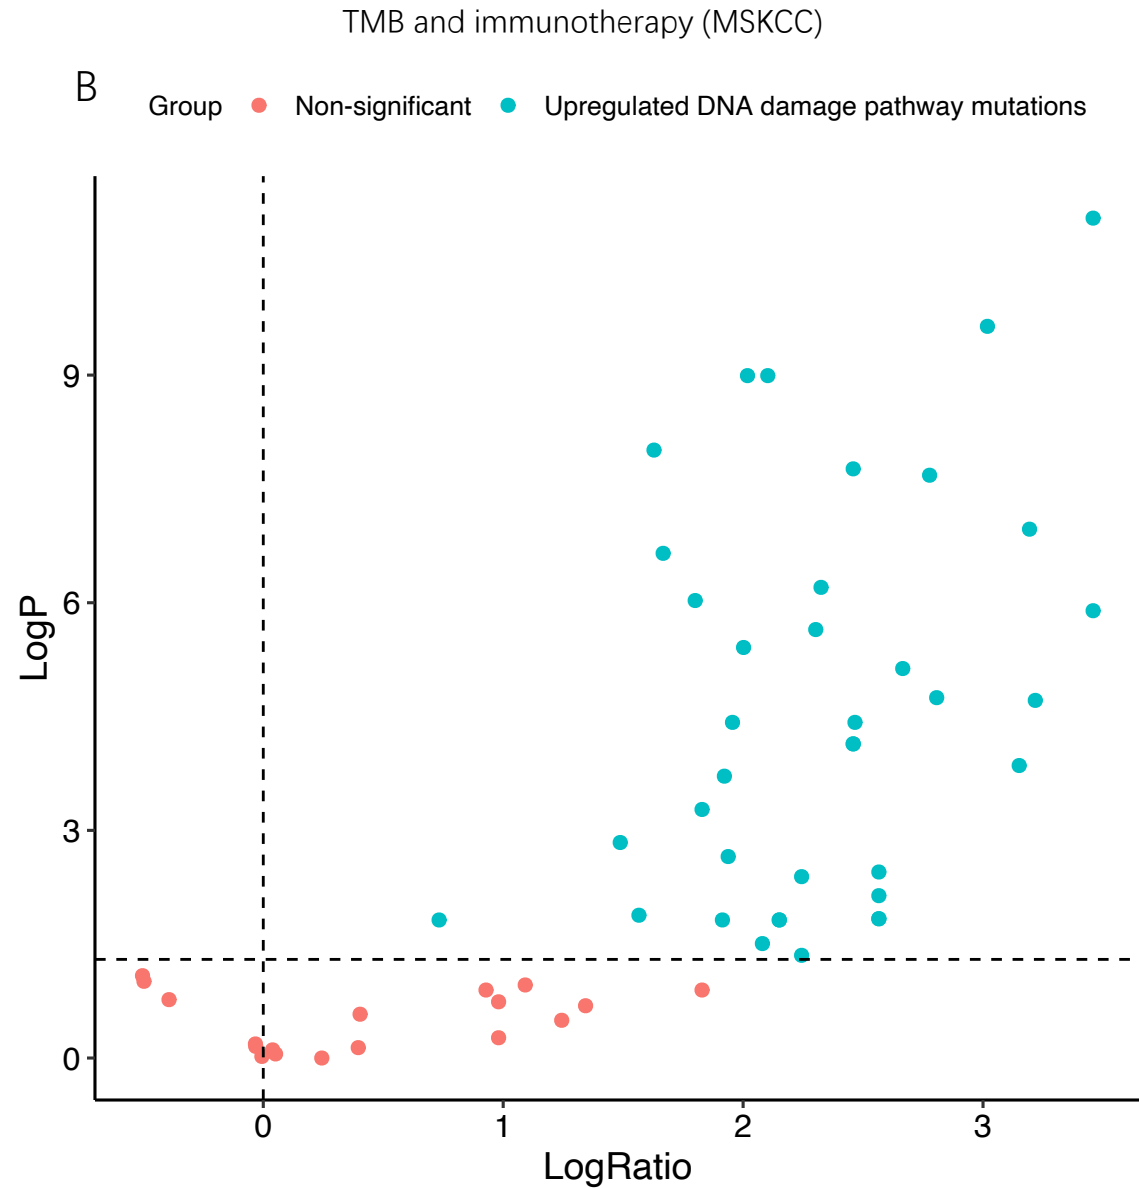

Figure S3

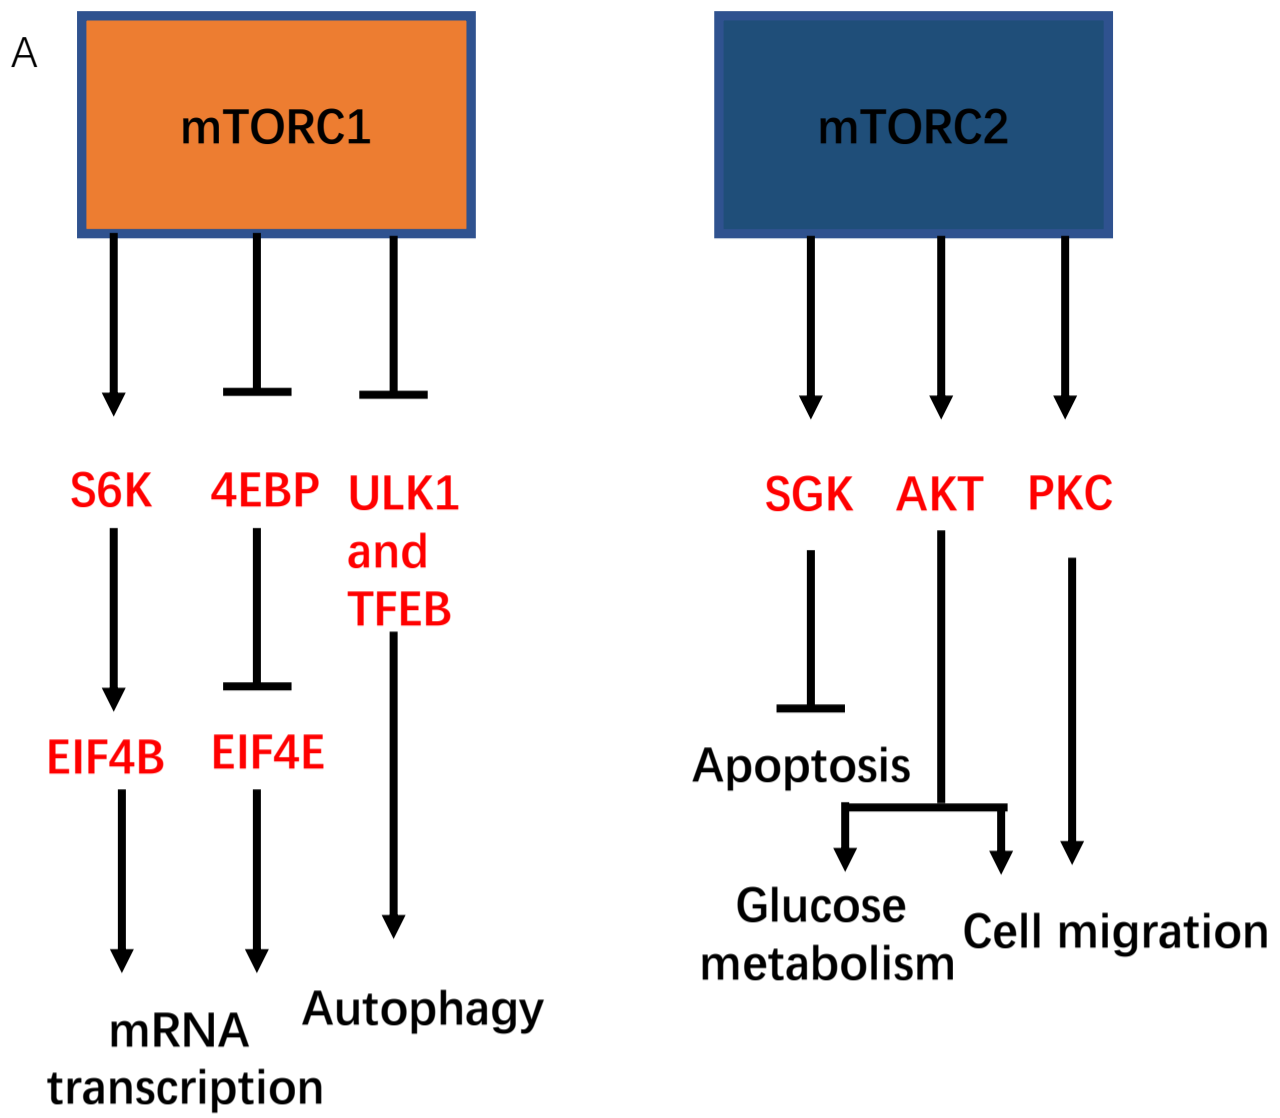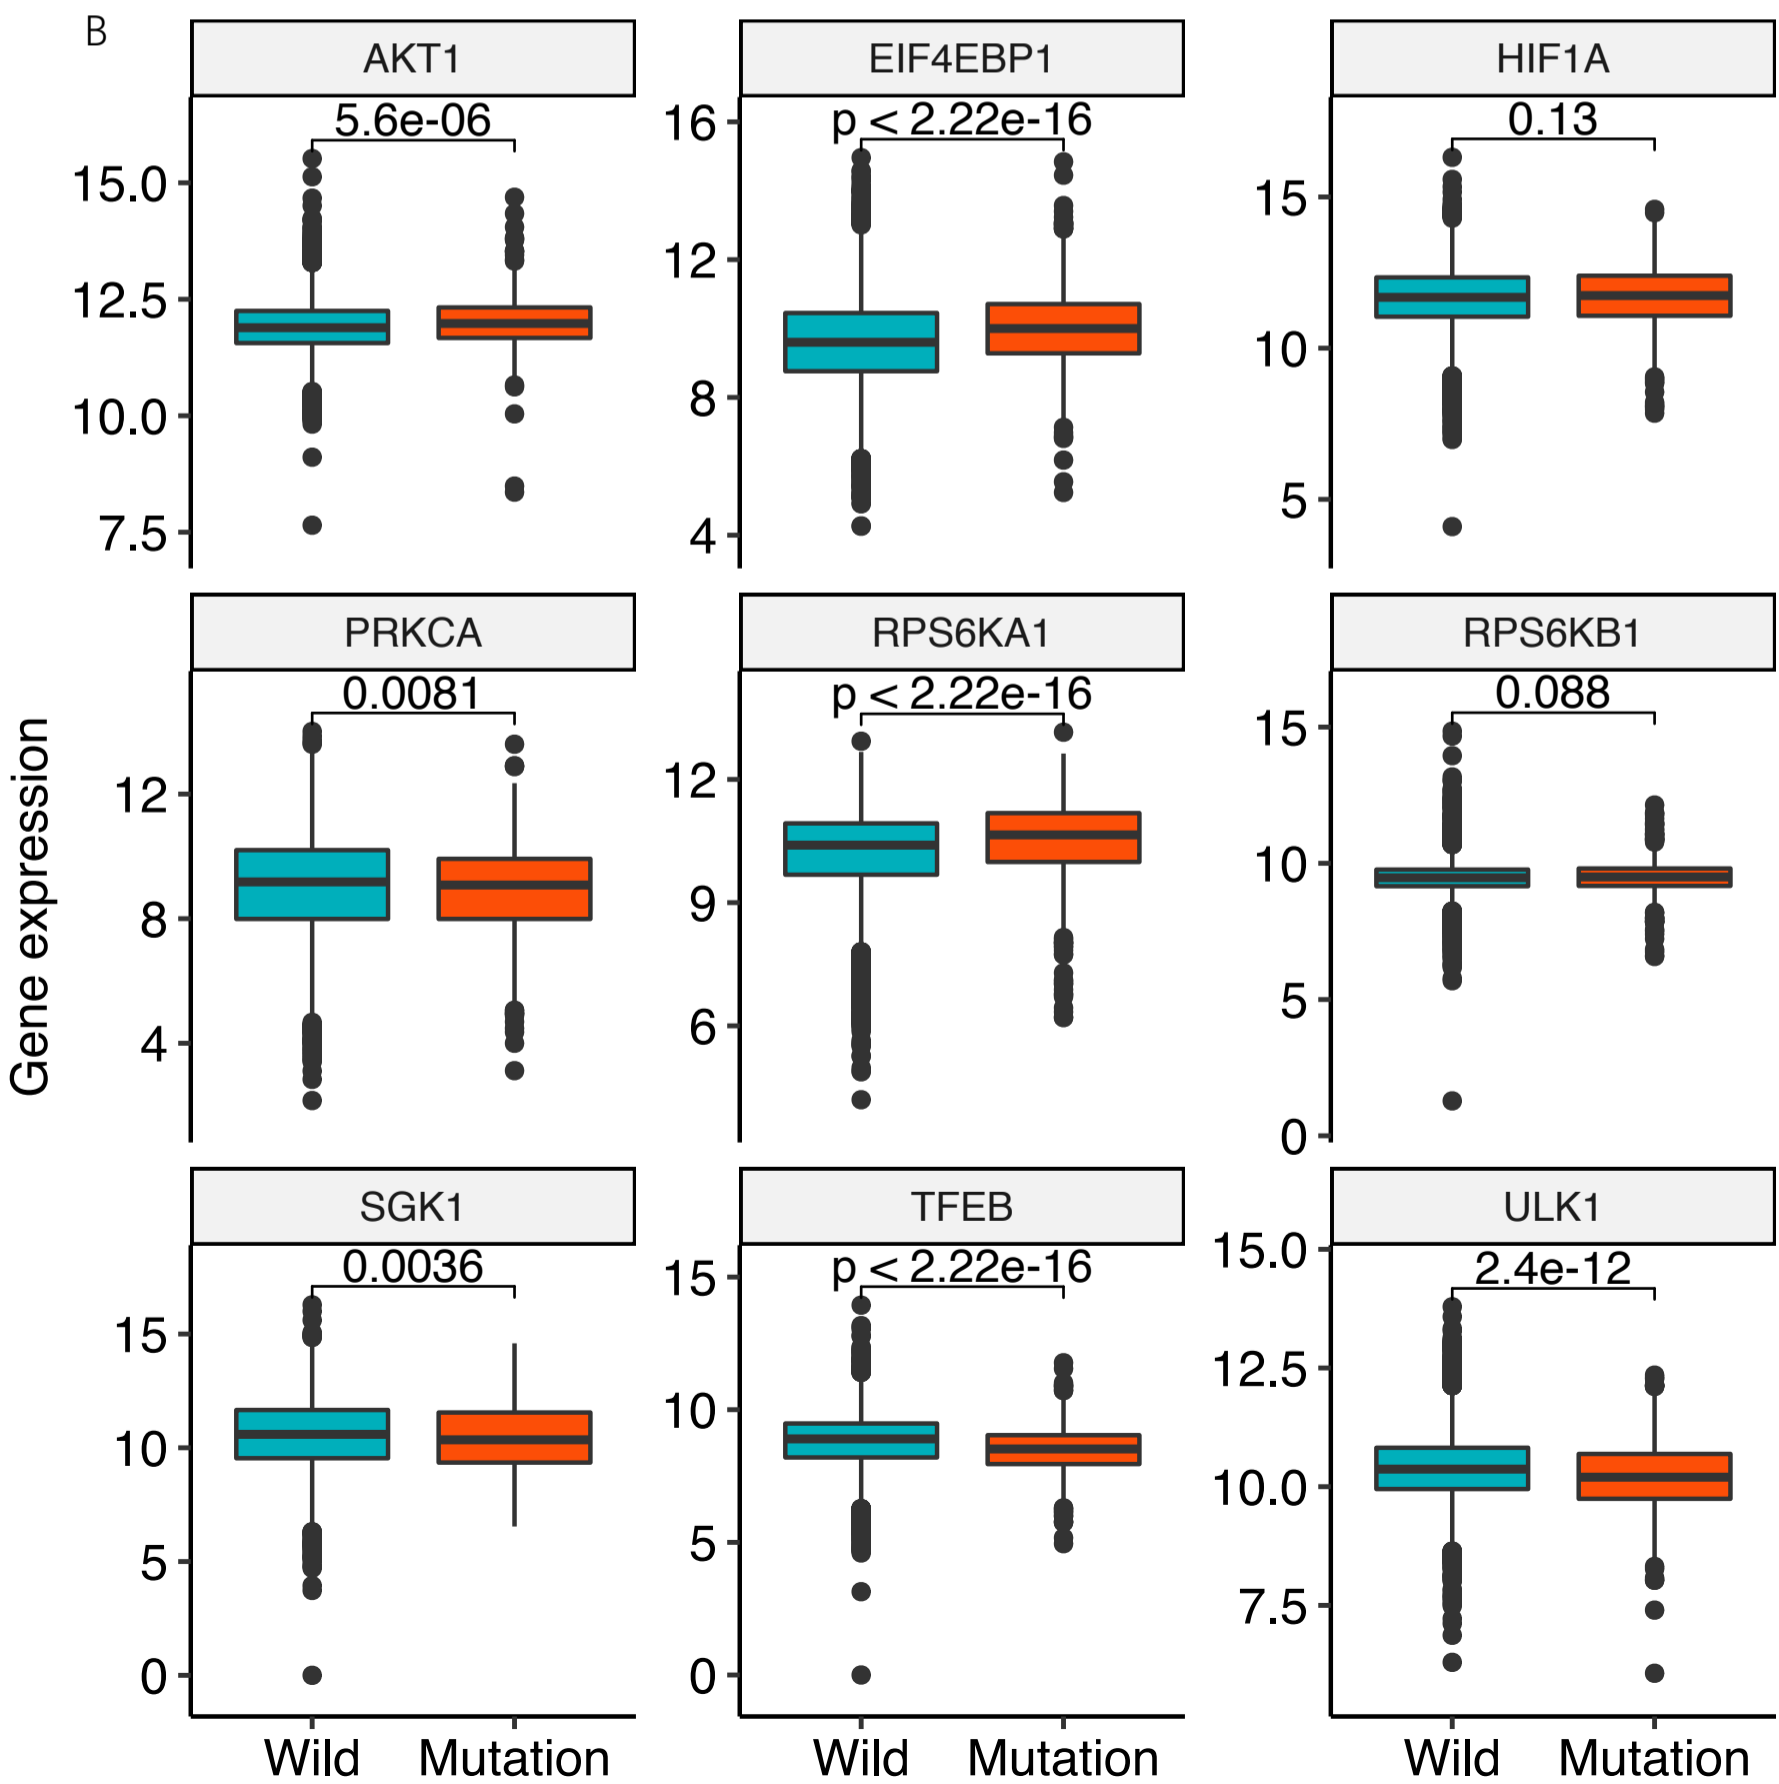

# A Figure S4

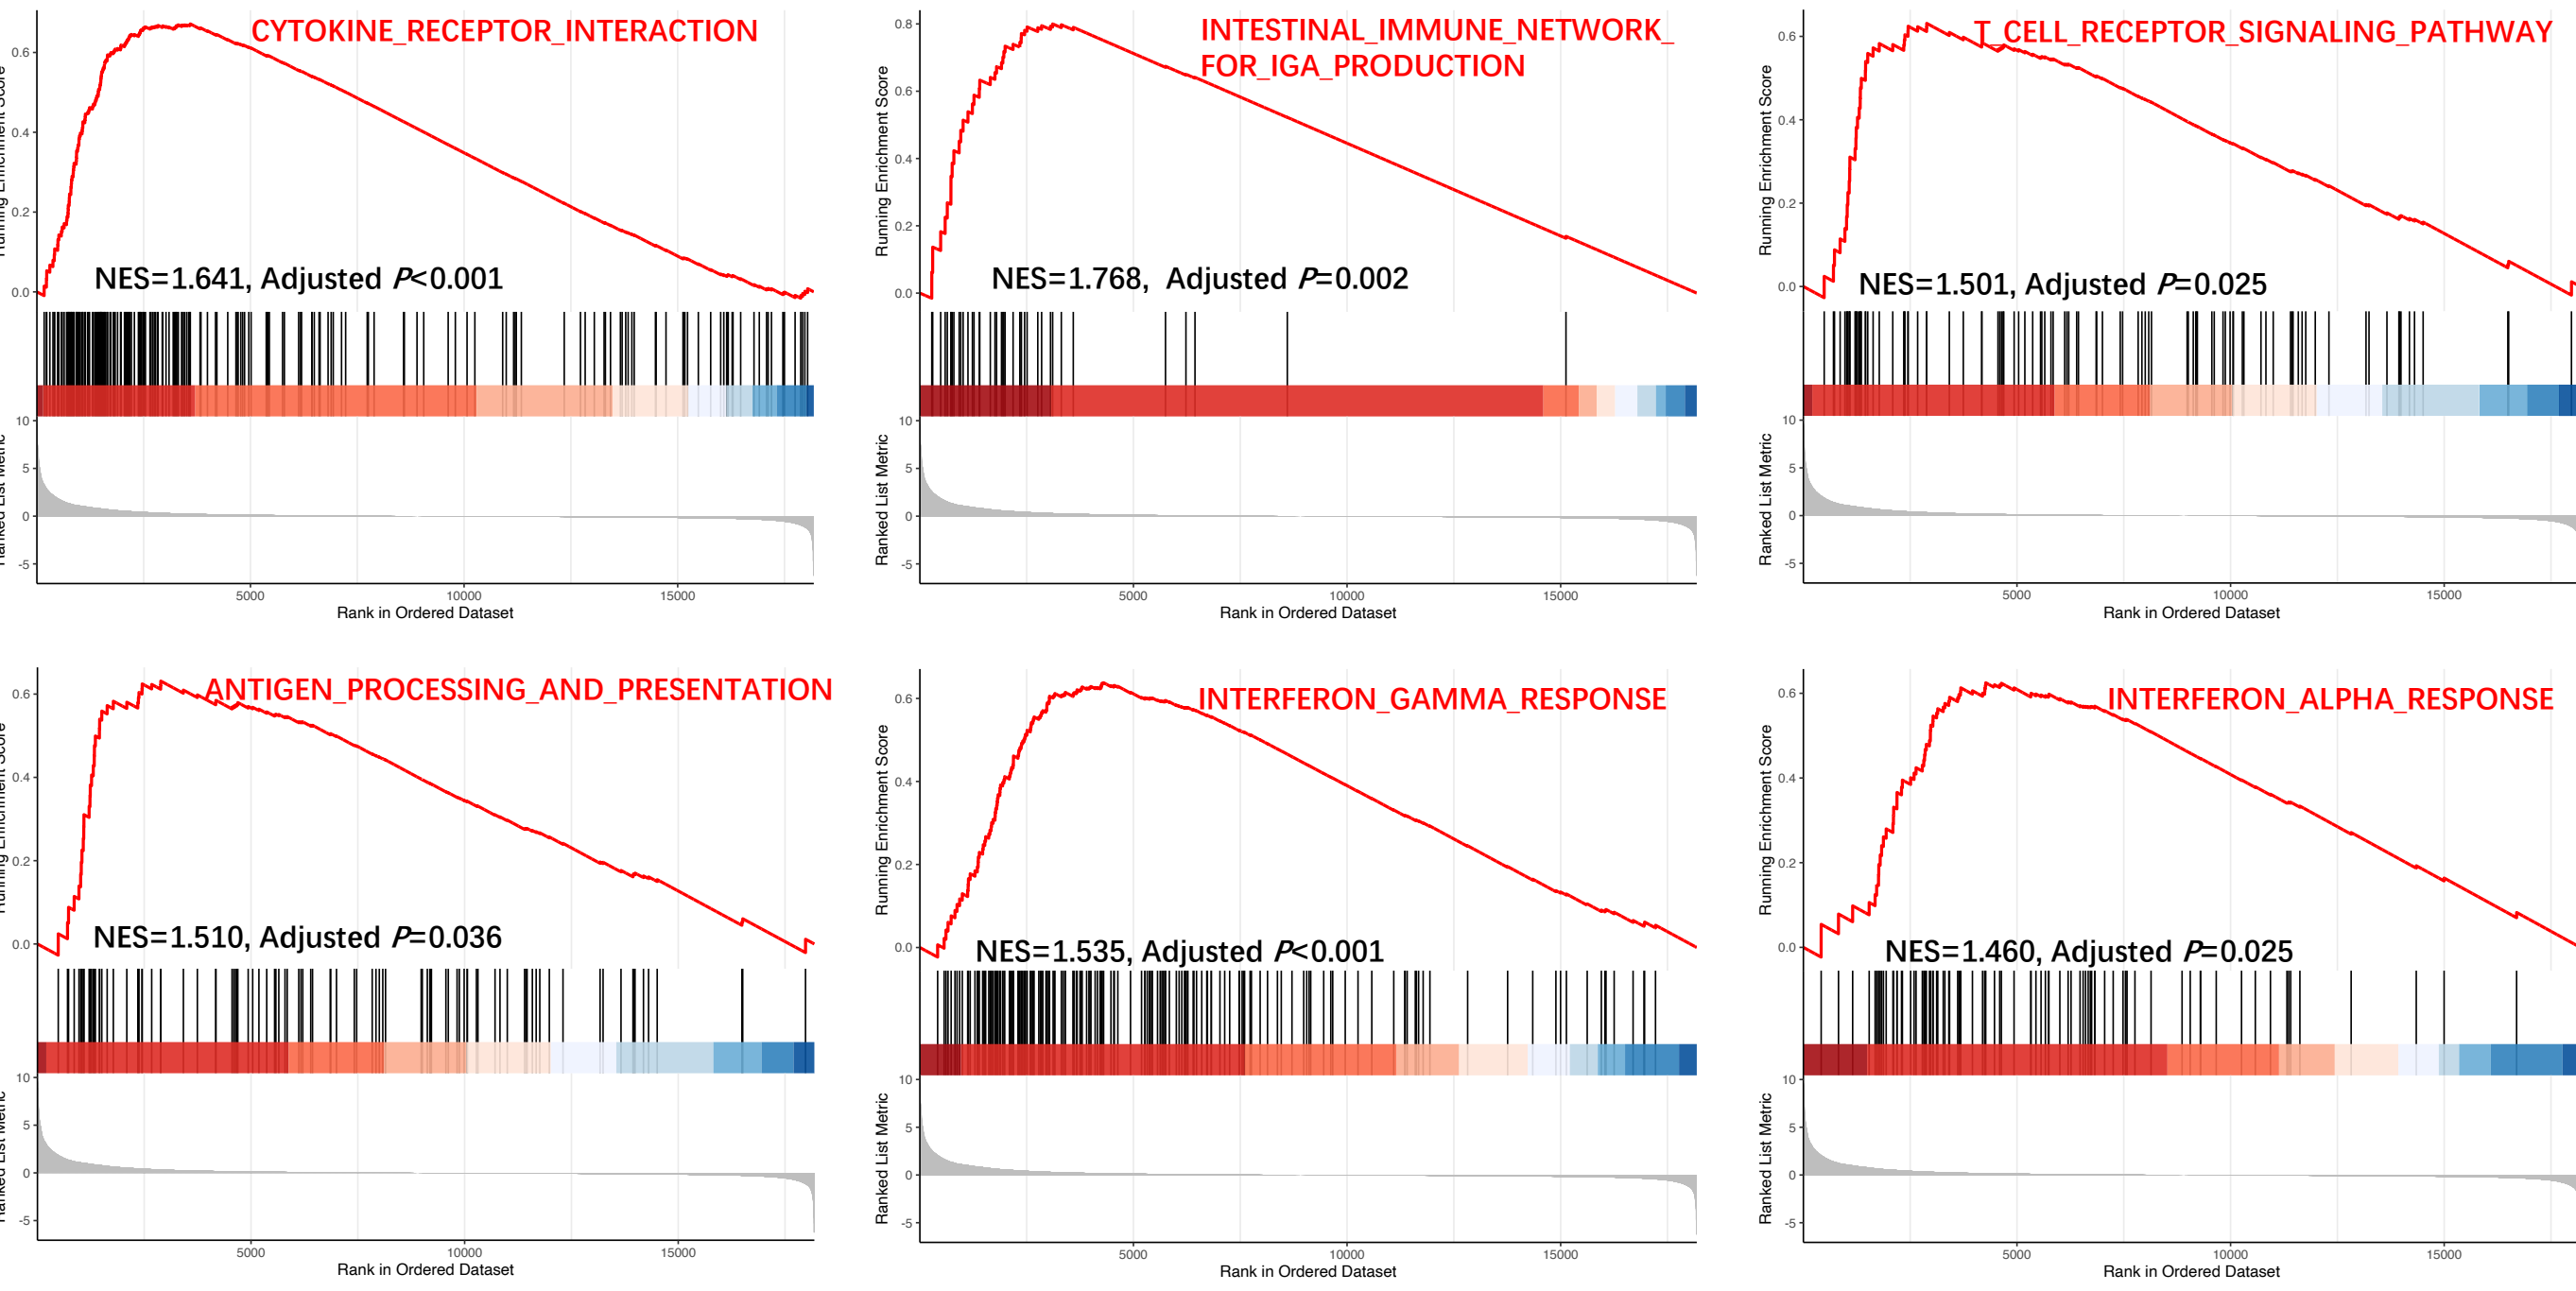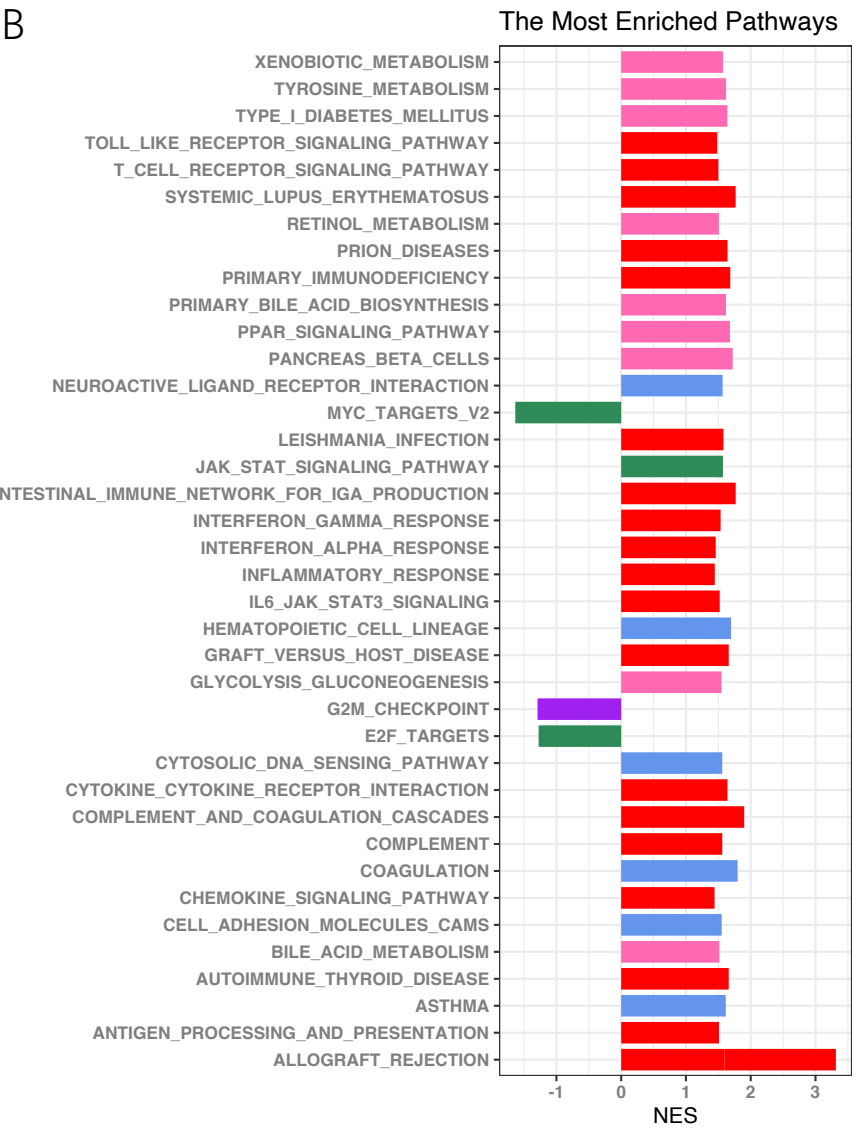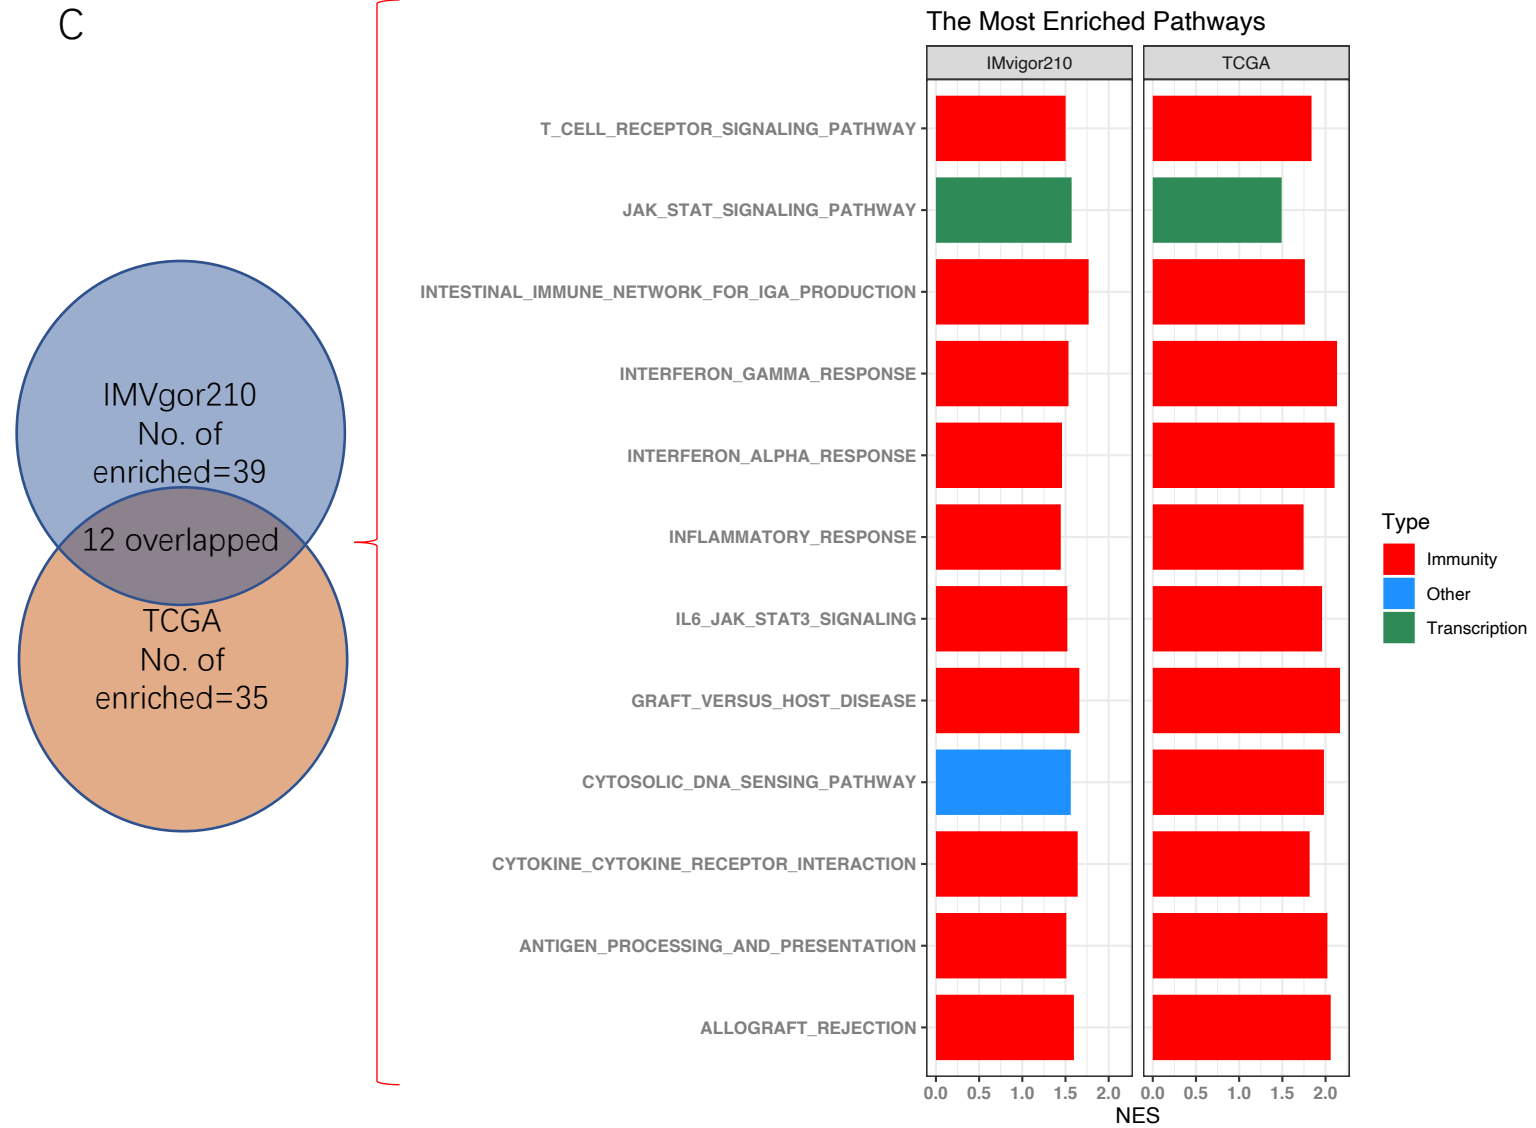

Figure S5

Baseline

After 2-cycle pembrolizumab treatment

A

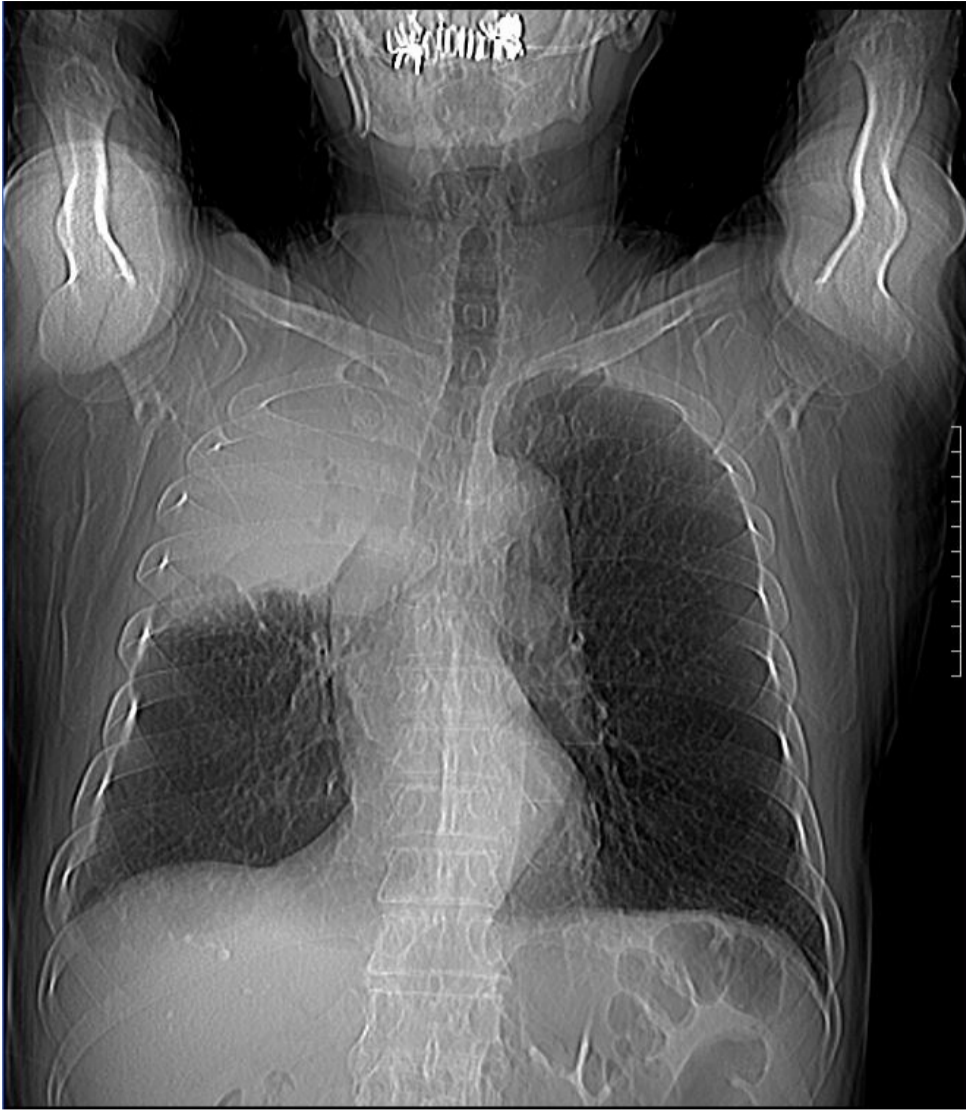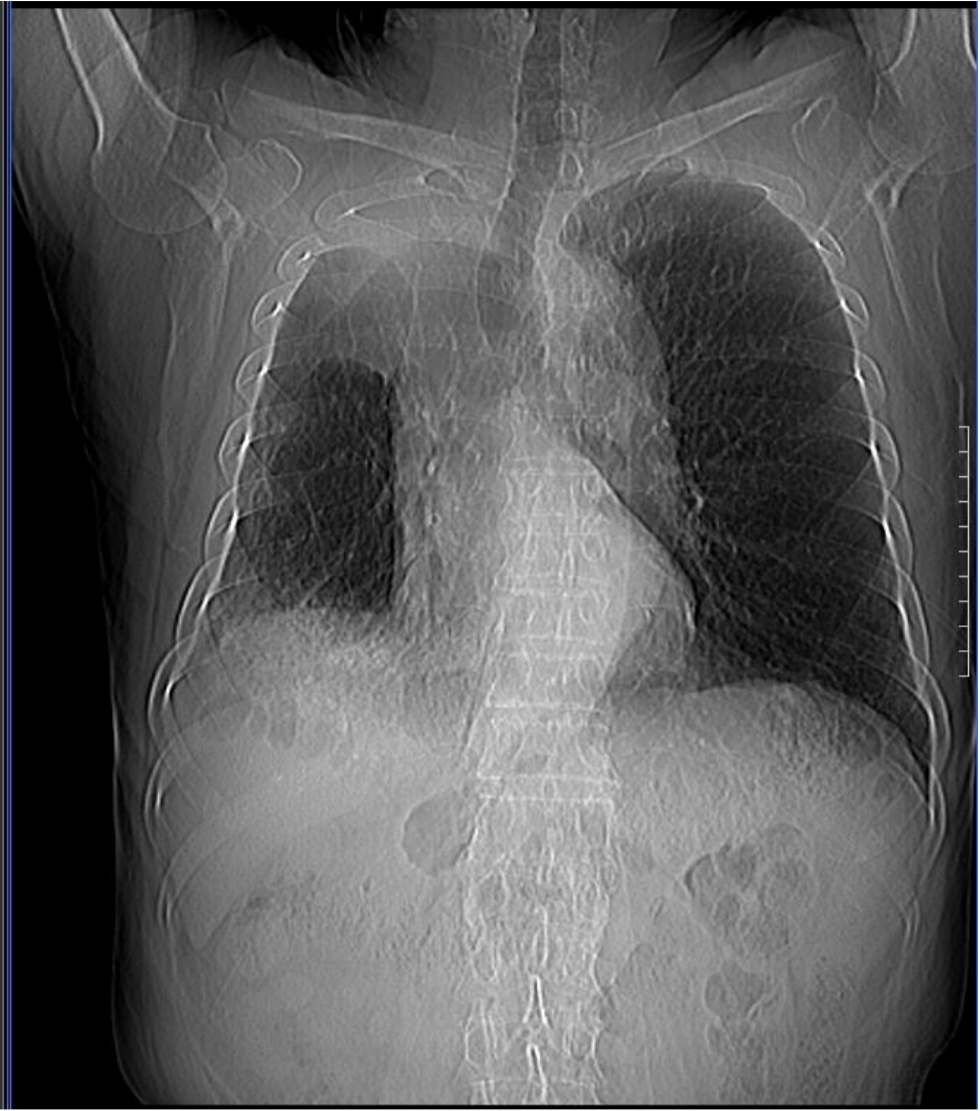

B

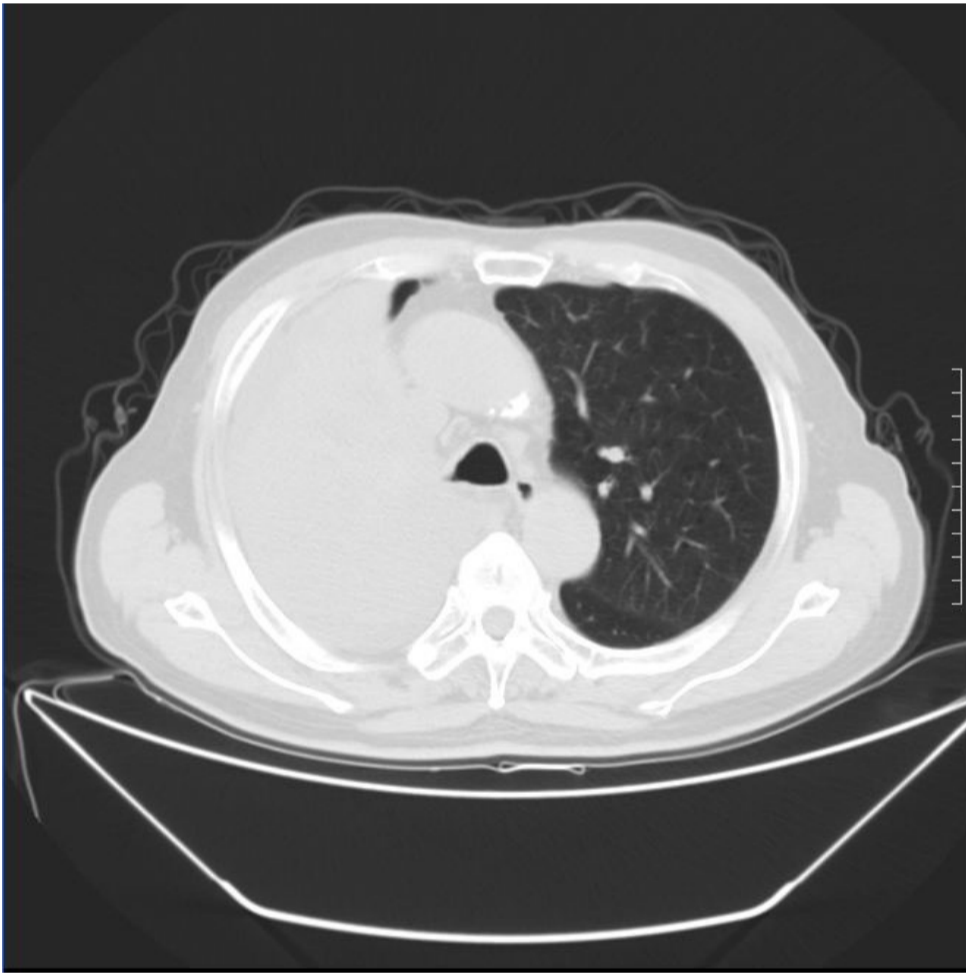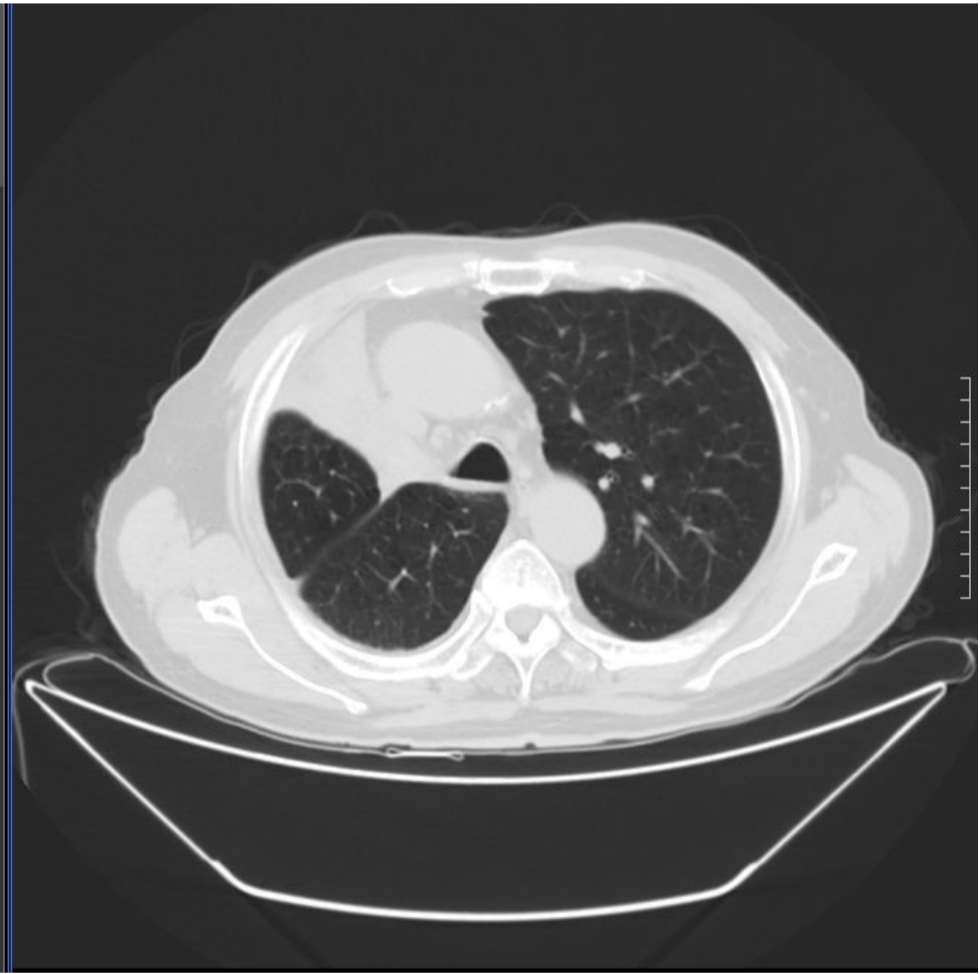

C

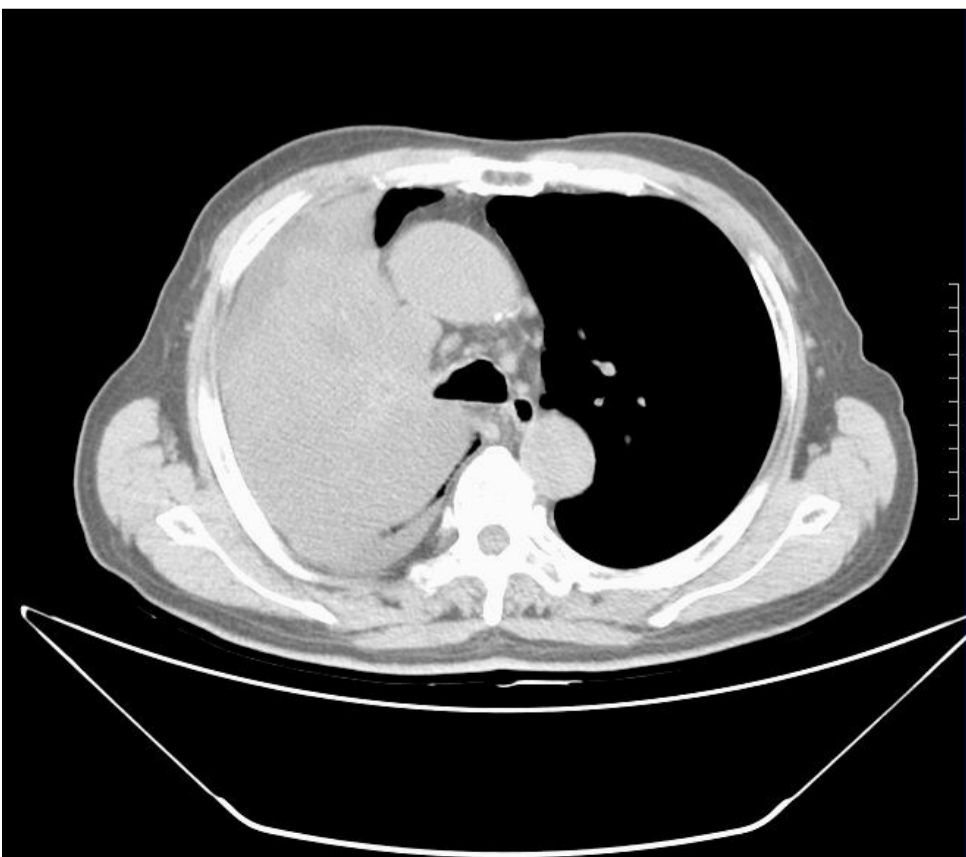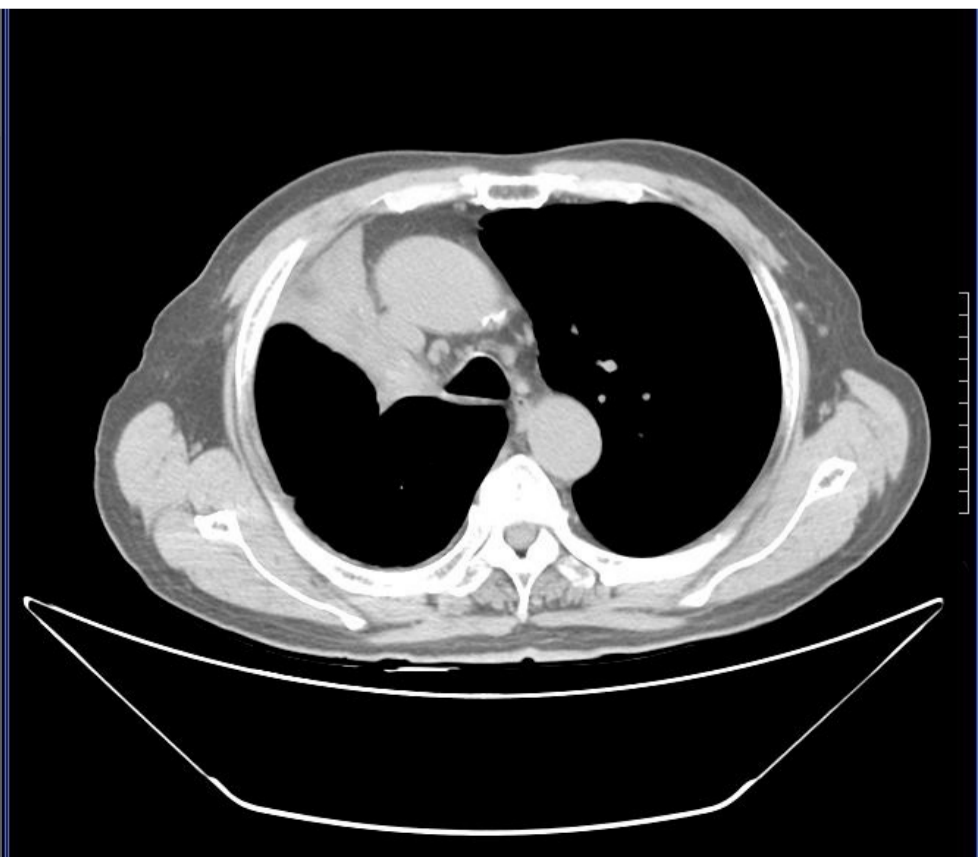

# Figure S6

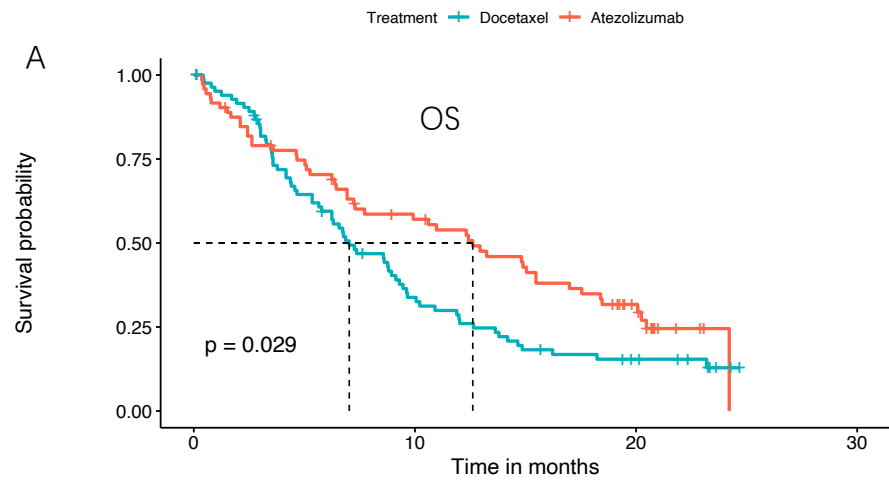

Number at risk

|              |    |    |    |   |
|--------------|----|----|----|---|
| Docetaxel    | 85 | 26 | 9  | 0 |
| Atezolizumab | 72 | 37 | 14 | 0 |

| Comparison    | HR (95% CI)      | <i>P</i> |
|---------------|------------------|----------|
| Atezo vs. Dox | 0.57 (0.38-0.84) | 0.005    |

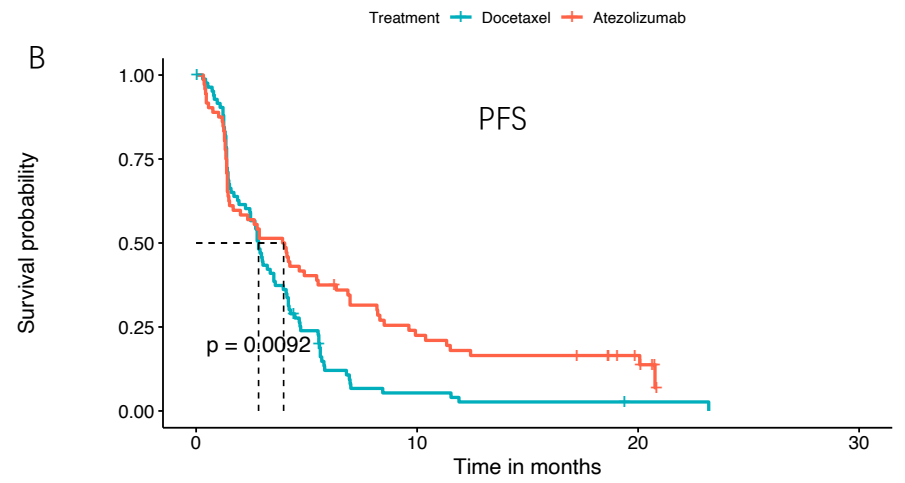

Number at risk

|              |    |    |   |   |
|--------------|----|----|---|---|
| Docetaxel    | 85 | 4  | 1 | 0 |
| Atezolizumab | 72 | 15 | 6 | 0 |

| Comparison    | HR (95% CI)      | <i>P</i> |
|---------------|------------------|----------|
| Atezo vs. Dox | 0.60 (0.42-0.87) | 0.007    |

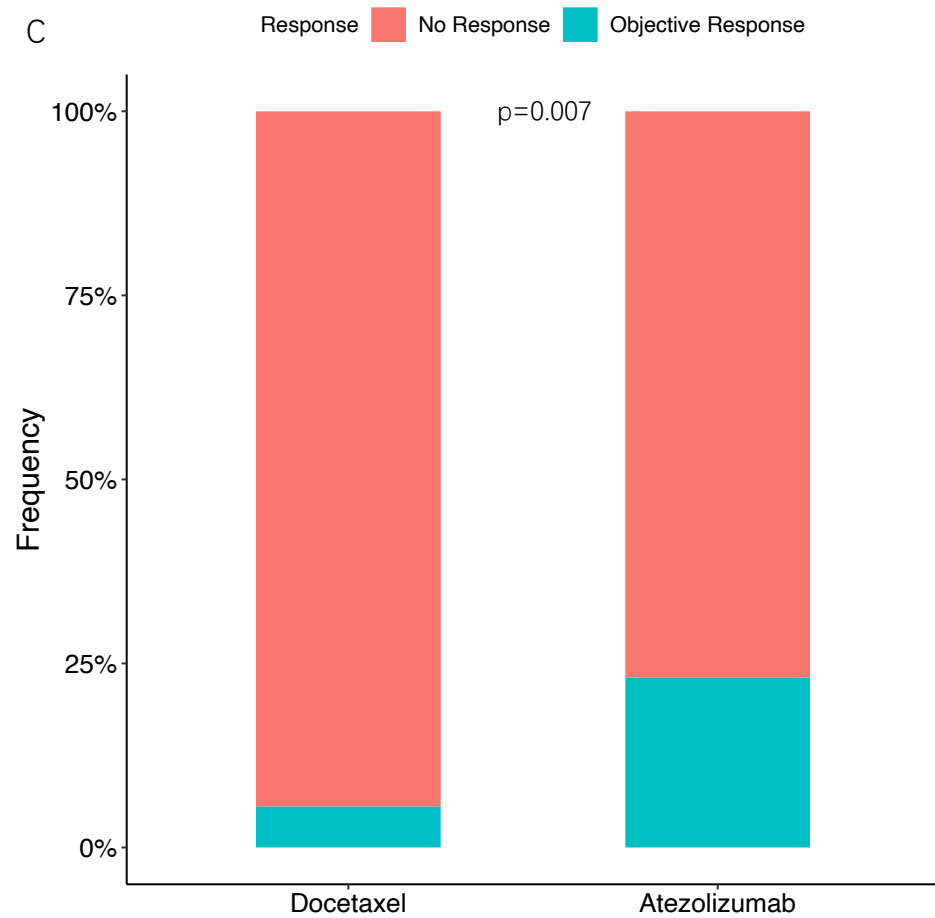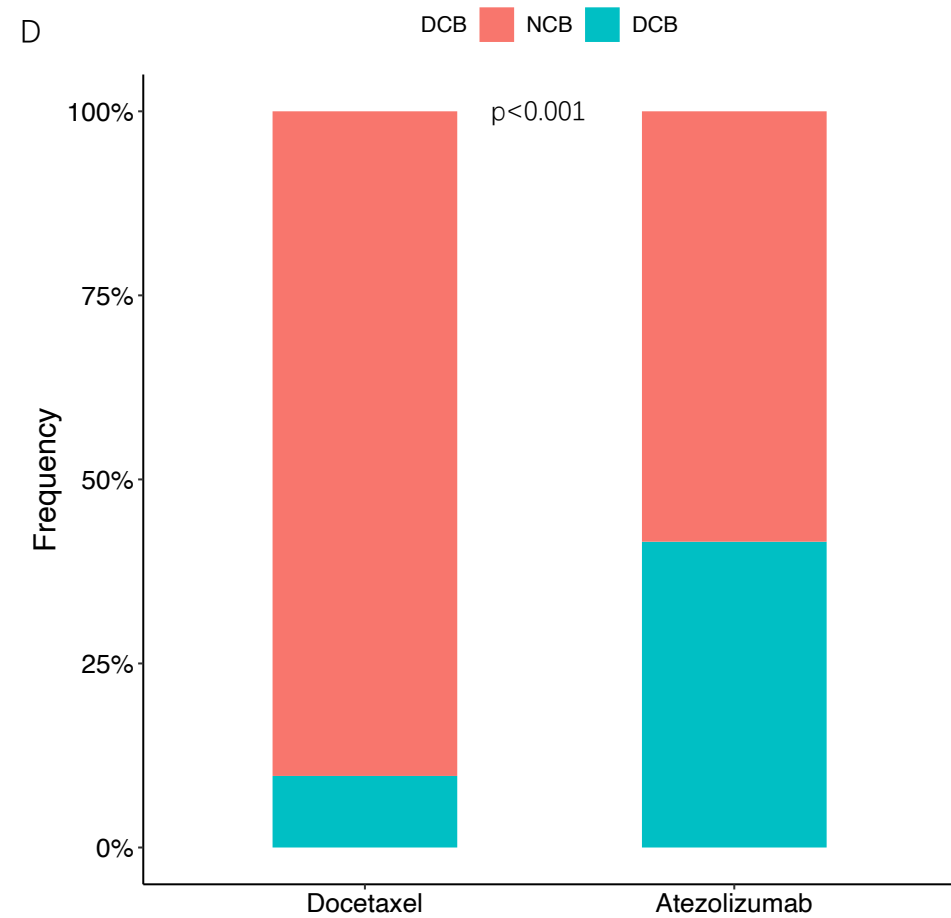

# Figure S7

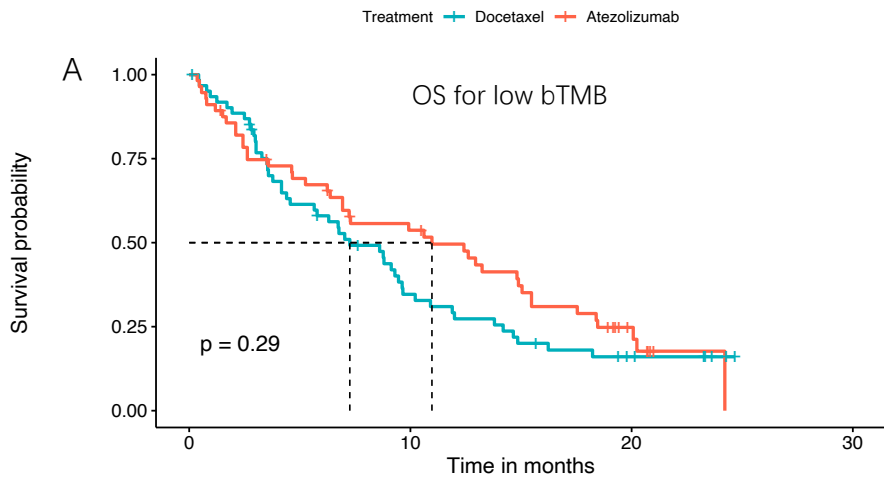

Number at risk

| Treatment    | 0  | 10 | 20 | 30 |
|--------------|----|----|----|----|
| Docetaxel    | 62 | 19 | 6  | 0  |
| Atezolizumab | 56 | 27 | 7  | 0  |

| Comparison    | HR (95% CI)      | <i>P</i> |
|---------------|------------------|----------|
| Atezo vs. Dox | 0.60 (0.38-0.96) | 0.033    |

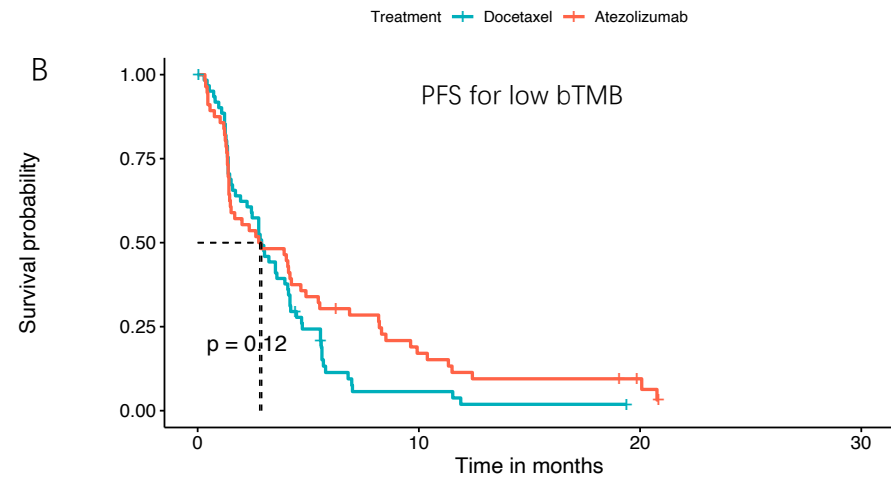

Number at risk

| Treatment    | 0  | 10 | 20 | 30 |
|--------------|----|----|----|----|
| Docetaxel    | 62 | 3  | 0  | 0  |
| Atezolizumab | 56 | 9  | 3  | 0  |

| Comparison    | LER (95% CI)     | <i>P</i> |
|---------------|------------------|----------|
| Atezo vs. Dox | 1.51 (1.02-2.24) | 0.040    |

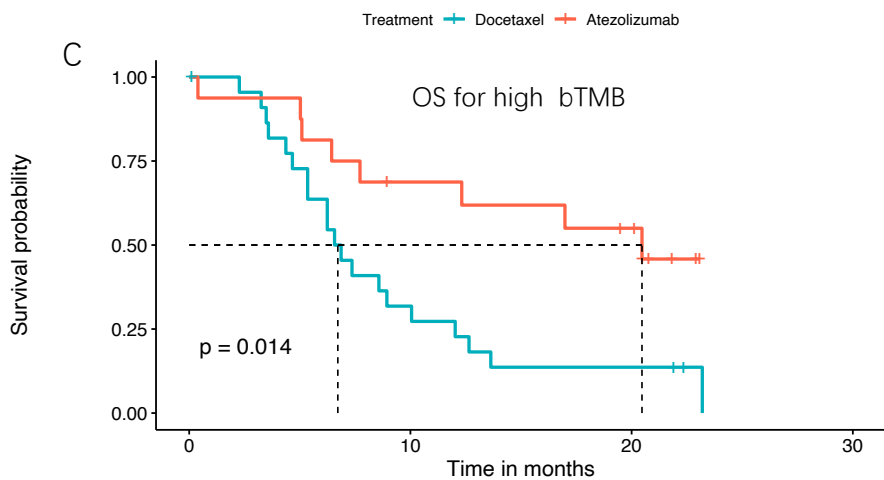

Number at risk

| Treatment    | 0  | 10 | 20 | 30 |
|--------------|----|----|----|----|
| Docetaxel    | 23 | 7  | 3  | 0  |
| Atezolizumab | 16 | 10 | 7  | 0  |

| Comparison    | HR (95% CI)      | <i>P</i> |
|---------------|------------------|----------|
| Atezo vs. Dox | 0.36 (0.15-0.88) | 0.026    |

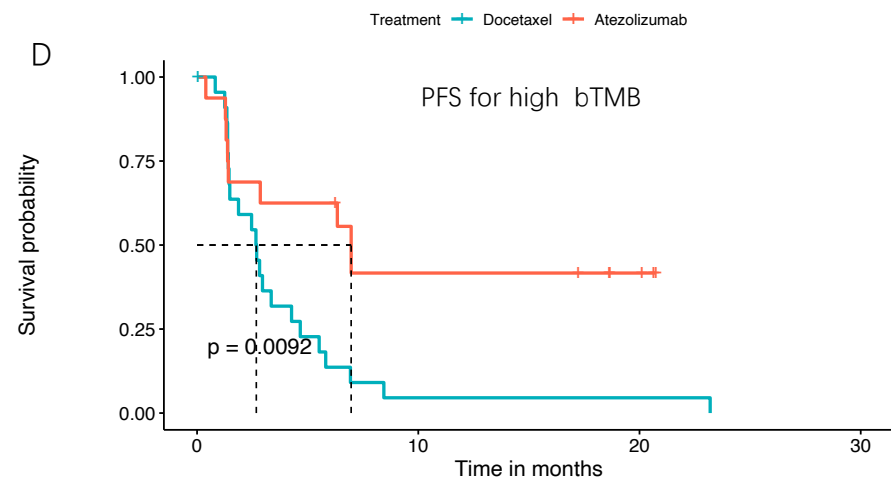

Number at risk

| Treatment    | 0  | 10 | 20 | 30 |
|--------------|----|----|----|----|
| Docetaxel    | 23 | 1  | 1  | 0  |
| Atezolizumab | 16 | 6  | 3  | 0  |

| Comparison    | LER (95% CI)     | <i>P</i> |
|---------------|------------------|----------|
| Atezo vs. Dox | 1.46 (0.75-2.88) | 0.263    |
